# Supplementary material for: Comparative methylome analysis in solid tumors reveals aberrant methylation at chromosome 6p in nasopharyngeal carcinoma
Source: PubMed Central journal article supplement (PMC4529346; doi:10.1002/cam4.451), 2015-04-29
Supplement: cam40004-1079-sd1.pdf [file cam40004-1079-sd1.pdf]

**Supplementary Table S1: Clinical parameters of the NPC patients in discovery and validation sets**

|                     | Discovery set<br>(N=25) | Validation set<br>(N=35) |
|---------------------|-------------------------|--------------------------|
| <b>Age (95% CI)</b> | 51 (46,55)              | 53 (48,58)               |
| <b>Gender</b>       |                         |                          |
| Female              | 5                       | 6                        |
| Male                | 20                      | 28                       |
| unknown             | 0                       | 1                        |
| <b>Stage</b>        |                         |                          |
| I                   | 3                       | 4                        |
| II                  | 2                       | 10                       |
| III                 | 13                      | 11                       |
| IV                  | 7                       | 9                        |
| unknown             | 0                       | 1                        |

**Supplementary Table S2: Differential methylation in 10 types of solid tumours collected by TCGA**

| Index | Type of Cancer               | #<br>Normal | #<br>Tumour | #<br>hyper | #<br>hypo | %<br>hyper | %<br>hypo |
|-------|------------------------------|-------------|-------------|------------|-----------|------------|-----------|
| 1     | Liver cancer                 | 50          | 98          | 40763      | 129619    | 23.92%     | 76.08%    |
| 2     | Rectal cancer                | 7           | 90          | 15240      | 30447     | 33.36%     | 66.64%    |
| 3     | Colon cancer                 | 38          | 258         | 51763      | 71013     | 42.16%     | 57.84%    |
| 4     | Head & neck cancer           | 50          | 310         | 76763      | 141180    | 35.22%     | 65.78%    |
| 5     | Lung squamous cell carcinoma | 75          | 227         | 126015     | 157598    | 44.43%     | 55.57%    |
| 6     | Thyroid cancer               | 56          | 200         | 24300      | 29447     | 45.21%     | 54.79%    |
| 7     | Kidney cancer                | 183         | 200         | 135296     | 131387    | 50.73%     | 49.27%    |
| 8     | Breast invasive cancer       | 98          | 200         | 112249     | 103039    | 52.14%     | 47.86%    |
| 9     | Lung adenocarcinoma          | 75          | 340         | 146526     | 122285    | 54.51%     | 45.49%    |
| 10    | Pancreatic cancer            | 7           | 49          | 10646      | 8580      | 55.37%     | 44.63%    |
| 11    | Prostate cancer              | 45          | 176         | 85308      | 56043     | 60.35%     | 39.65%    |
|       | Total                        | 684         | 2148        |            |           |            |           |

**Supplementary Table S3: Bisulphite pyrosequencing primers and PCR conditions**

| Probe ID   | gene symbol | Assay name          | Amplicon length | Biotin modification on | Location                 | Number of CpGs | PCR conditions                                                             |
|------------|-------------|---------------------|-----------------|------------------------|--------------------------|----------------|----------------------------------------------------------------------------|
| CG11059239 | TGM2        | Hs_CG11059239_01_PM | 307             | Reverse primer         | chr20:36793478-36793785  | 8              | 95°C 6min,45 cycles (95°C 30 sec, 56°C 30 sec and 70°C 30 sec), 72°C 5 min |
| CG07844977 | SERPINB9    | Hs_CG07844977_01_PM | 310             | Reverse Primer         | chr6:2903505-2903815     | 6              | 95°C 6min,45 cycles (95°C 30 sec, 54°C 30 sec and 70°C 30 sec), 72°C 5 min |
| CG11456756 | HLA-L       | Hs_CG11456756_03_PM | 210             | Reverse primer         | chr6:30227917-30228127   | 6              | 95°C 6min,45 cycles (95°C 30 sec, 56°C 30 sec and 70°C 30 sec), 72°C 5 min |
| CG12232308 | IER3        | Hs_CG12232308_01_PM | 244             | Reverse primer         | chr6:30711398-30711642   | 6              | 95°C 6min,45 cycles (95°C 30 sec, 62°C 30 sec and 70°C 30 sec), 72°C 5 min |
| CG11664500 | EYA4        | Hs_CG11664500_01_PM | 249             | Reverse primer         | chr6:133562278-133562527 | 9              | 95°C 6min,45 cycles (95°C 30 sec, 58°C 30 sec and 70°C 30 sec), 72°C 5 min |
| CG22903300 | HCG4        | Hs_CG22903300_03_PM | 209             | Reverse primer         | chr6:29760652-29760861   | 7              | 95°C 6min,45 cycles (95°C 30 sec, 56°C 30 sec and 70°C 30 sec), 72°C 5 min |

**Supplementary Table S4: KEGG pathways associated with *de novo* methylation in NPC**

| <b>Term</b>                                                     | <b>Count</b> | <b>%</b> | <b>p value</b> | <b>Fold Enrichment</b> | <b>Adjusted p value</b> |
|-----------------------------------------------------------------|--------------|----------|----------------|------------------------|-------------------------|
| hsa04020:Calcium signaling pathway                              | 44           | 2.38     | 4.42E-08       | 2.39                   | 7.52E-06                |
| hsa04950:Maturity onset diabetes of the young                   | 14           | 0.76     | 2.72E-07       | 5.30                   | 2.31E-05                |
| hsa05200:Pathways in cancer                                     | 55           | 2.97     | 3.57E-04       | 1.60                   | 2.00E-02                |
| hsa05217:Basal cell carcinoma                                   | 16           | 0.86     | 3.93E-04       | 2.75                   | 1.66E-02                |
| hsa04310:Wnt signaling pathway                                  | 30           | 1.62     | 7.97E-04       | 1.89                   | 2.67E-02                |
| hsa04510:Focal adhesion                                         | 36           | 1.95     | 0.001441       | 1.71                   | 4.00E-02                |
| hsa04080:Neuroactive ligand-receptor interaction                | 43           | 2.32     | 0.001515       | 1.61                   | 3.62E-02                |
| hsa04070:Phosphatidylinositol signaling system                  | 17           | 0.92     | 0.00373        | 2.17                   | 7.63E-02                |
| hsa04810:Regulation of actin cytoskeleton                       | 36           | 1.95     | 0.004309       | 1.61                   | 7.83E-02                |
| hsa04916:Melanogenesis                                          | 20           | 1.08     | 0.006665       | 1.91                   | 1.07E-01                |
| hsa04010:MAPK signaling pathway                                 | 41           | 2.22     | 0.012736       | 1.45                   | 1.80E-01                |
| hsa04350:TGF-beta signaling pathway                             | 17           | 0.92     | 0.016332       | 1.87                   | 2.08E-01                |
| hsa05412:Arrhythmogenic right ventricular cardiomyopathy (ARVC) | 15           | 0.81     | 0.020778       | 1.92                   | 2.40E-01                |
| hsa04540:Gap junction                                           | 17           | 0.92     | 0.02219        | 1.81                   | 2.39E-01                |
| hsa04360:Axon guidance                                          | 22           | 1.19     | 0.027704       | 1.61                   | 2.73E-01                |
| hsa04340:Hedgehog signaling pathway                             | 12           | 0.65     | 0.029594       | 2.03                   | 2.73E-01                |
| hsa04670:Leukocyte transendothelial migration                   | 20           | 1.08     | 0.03067        | 1.65                   | 2.68E-01                |

Supplementary Table S5: *De Novo* methylated regions in NPC

| Index | Chr | start     | end       | Gene       | Region                    | length | $\beta_{\text{PBMC}}$ | $\beta_{\text{normal}}$ | $\beta_{\text{tumour}}$ | # CG site | correct FDR | H3K27me3 | H3K4me3 |
|-------|-----|-----------|-----------|------------|---------------------------|--------|-----------------------|-------------------------|-------------------------|-----------|-------------|----------|---------|
| 1     | 6   | 33245460  | 33245638  | B3GALT4    | chr6:33245460-33245638    | 178    | 0.14                  | 0.14                    | 0.26                    | 12        | 3.83E-24    | 0        | 1       |
| 2     | 6   | 30228003  | 30228083  | HLA-L      | chr6:30228003-30228083    | 80     | 0.07                  | 0.12                    | 0.39                    | 8         | 5.12E-20    | 1        | 1       |
| 3     | 6   | 32116841  | 32116994  | PRRT1      | chr6:32116841-32116994    | 153    | 0.08                  | 0.21                    | 0.32                    | 11        | 1.31E-19    | 1        | 1       |
| 4     | 12  | 115136175 | 115136308 |            | chr12:115136175-115136308 | 133    | 0.07                  | 0.15                    | 0.32                    | 9         | 1.31E-19    | 1        | 1       |
| 5     | 12  | 115134886 | 115135076 |            | chr12:115134886-115135076 | 190    | 0.08                  | 0.20                    | 0.38                    | 12        | 7.00E-19    | 1        | 0       |
| 6     | 6   | 32055370  | 32055534  | TNXB       | chr6:32055370-32055534    | 164    | 0.05                  | 0.07                    | 0.24                    | 9         | 8.34E-18    | 1        | 1       |
| 7     | 5   | 33936232  | 33936402  | RXFP3      | chr5:33936232-33936402    | 170    | 0.03                  | 0.11                    | 0.30                    | 8         | 6.00E-17    | 1        | 1       |
| 8     | 7   | 50861418  | 50861654  | GRB10      | chr7:50861418-50861654    | 236    | 0.10                  | 0.20                    | 0.33                    | 10        | 1.45E-16    | 1        | 1       |
| 9     | 6   | 133562461 | 133562494 | EYA4       | chr6:133562461-133562494  | 33     | 0.05                  | 0.19                    | 0.38                    | 9         | 4.49E-16    | 1        | 1       |
| 10    | 2   | 25391656  | 25391720  | POMC       | chr2:25391656-25391720    | 64     | 0.12                  | 0.14                    | 0.38                    | 6         | 1.27E-15    | 1        | 1       |
| 11    | 6   | 152128328 | 152128588 | ESR1       | chr6:152128328-152128588  | 260    | 0.09                  | 0.12                    | 0.18                    | 13        | 2.04E-15    | 1        | 1       |
| 12    | 7   | 94284380  | 94284539  | SGCE;PEG10 | chr7:94284380-94284539    | 159    | 0.06                  | 0.07                    | 0.23                    | 11        | 7.25E-15    | 0        | 1       |
| 13    | 6   | 28956226  | 28956327  |            | chr6:28956226-28956327    | 101    | 0.12                  | 0.16                    | 0.38                    | 9         | 4.67E-14    | 0        | 1       |
| 14    | 1   | 3568210   | 3568245   | TP73       | chr1:3568210-3568245      | 35     | 0.05                  | 0.24                    | 0.48                    | 5         | 5.20E-14    | 1        | 1       |
| 15    | 4   | 25657365  | 25657440  | SLC34A2    | chr4:25657365-25657440    | 75     | 0.06                  | 0.23                    | 0.45                    | 6         | 8.02E-14    | 1        | 1       |
| 16    | 11  | 6341842   | 6341908   | PRKCDBP    | chr11:6341842-6341908     | 66     | 0.08                  | 0.10                    | 0.27                    | 7         | 8.13E-14    | 0        | 1       |
| 17    | 11  | 43602845  | 43602965  | MIR129-2   | chr11:43602845-43602965   | 120    | 0.03                  | 0.11                    | 0.31                    | 7         | 9.11E-14    | 1        | 1       |
| 18    | 19  | 9473674   | 9473715   | ZNF177     | chr19:9473674-9473715     | 41     | 0.09                  | 0.30                    | 0.45                    | 6         | 2.24E-13    | 0        | 0       |
| 19    | 5   | 16180033  | 16180076  | MARCH11    | chr5:16180033-16180076    | 43     | 0.03                  | 0.21                    | 0.39                    | 7         | 2.86E-13    | 1        | 1       |
| 20    | 2   | 24232847  | 24232891  | MFS2B      | chr2:24232847-24232891    | 44     | 0.03                  | 0.04                    | 0.16                    | 7         | 6.44E-13    | 1        | 1       |
| 21    | 18  | 74961724  | 74961809  | GALR1      | chr18:74961724-74961809   | 85     | 0.07                  | 0.22                    | 0.38                    | 7         | 7.25E-13    | 1        | 1       |
| 22    | 19  | 11784647  | 11784774  | ZNF833     | chr19:11784647-11784774   | 127    | 0.10                  | 0.14                    | 0.31                    | 6         | 1.22E-12    | 0        | 1       |
| 23    | 2   | 182521874 | 182521926 | CERKL      | chr2:182521874-182521926  | 52     | 0.04                  | 0.04                    | 0.15                    | 6         | 1.93E-12    | 1        | 1       |
| 24    | 6   | 30698706  | 30698784  | FLOT1      | chr6:30698706-30698784    | 78     | 0.08                  | 0.16                    | 0.27                    | 6         | 2.00E-12    | 0        | 0       |
| 25    | 3   | 13590415  | 13590450  | FBLN2      | chr3:13590415-13590450    | 35     | 0.16                  | 0.27                    | 0.41                    | 6         | 2.42E-12    | 1        | 1       |
| 26    | 6   | 166582159 | 166582206 | T          | chr6:166582159-166582206  | 47     | 0.05                  | 0.14                    | 0.38                    | 5         | 7.24E-12    | 1        | 1       |
| 27    | 19  | 21106002  | 21106053  | ZNF85      | chr19:21106002-21106053   | 51     | 0.08                  | 0.16                    | 0.30                    | 6         | 9.34E-12    | 0        | 1       |
| 28    | 19  | 17982682  | 17982759  | SLC5A5     | chr19:17982682-17982759   | 77     | 0.07                  | 0.09                    | 0.16                    | 6         | 9.56E-12    | 0        | 0       |
| 29    | 2   | 201450506 | 201450633 | AOX1       | chr2:201450506-201450633  | 127    | 0.04                  | 0.06                    | 0.13                    | 7         | 1.01E-11    | 1        | 1       |
| 30    | 10  | 134901279 | 134901305 | GPR123     | chr10:134901279-134901305 | 26     | 0.03                  | 0.22                    | 0.38                    | 5         | 1.03E-11    | 1        | 1       |
| 31    | 10  | 134600651 | 134600701 | NKX6-2     | chr10:134600651-134600701 | 50     | 0.02                  | 0.21                    | 0.38                    | 5         | 1.39E-11    | 1        | 0       |
| 32    | 7   | 105221985 | 105222048 | EFCAB10    | chr7:105221985-105222048  | 63     | 0.06                  | 0.07                    | 0.28                    | 6         | 1.48E-11    | 0        | 1       |
| 33    | 6   | 28602566  | 28602791  |            | chr6:28602566-28602791    | 225    | 0.09                  | 0.11                    | 0.19                    | 11        | 1.79E-11    | 1        | 1       |

|    |    |           |           |           |                           |     |      |      |      |   |          |   |   |
|----|----|-----------|-----------|-----------|---------------------------|-----|------|------|------|---|----------|---|---|
| 34 | 20 | 43729861  | 43729910  | KCNS1     | chr20:43729861-43729910   | 49  | 0.27 | 0.25 | 0.43 | 5 | 1.96E-11 | 1 | 1 |
| 35 | 4  | 76555772  | 76555856  | CDKL2     | chr4:76555772-76555856    | 84  | 0.04 | 0.05 | 0.20 | 6 | 2.02E-11 | 0 | 1 |
| 36 | 7  | 27205114  | 27205230  | HOXA9     | chr7:27205114-27205230    | 116 | 0.03 | 0.11 | 0.26 | 6 | 2.07E-11 | 1 | 0 |
| 37 | 16 | 66613206  | 66613278  | CMTM2     | chr16:66613206-66613278   | 72  | 0.03 | 0.22 | 0.33 | 5 | 3.07E-11 | 1 | 1 |
| 38 | 6  | 30071344  | 30071427  | TRIM31    | chr6:30071344-30071427    | 83  | 0.06 | 0.08 | 0.16 | 8 | 3.14E-11 | 1 | 1 |
| 39 | 8  | 38964944  | 38965026  | ADAM32    | chr8:38964944-38965026    | 82  | 0.09 | 0.21 | 0.43 | 5 | 3.67E-11 | 0 | 0 |
| 40 | 18 | 60988017  | 60988096  | BCL2      | chr18:60988017-60988096   | 79  | 0.08 | 0.08 | 0.25 | 5 | 3.70E-11 | 1 | 1 |
| 41 | 6  | 28557388  | 28557575  |           | chr6:28557388-28557575    | 187 | 0.08 | 0.07 | 0.17 | 9 | 4.67E-11 | 0 | 1 |
| 42 | 15 | 90039794  | 90039822  | RHCG      | chr15:90039794-90039822   | 28  | 0.08 | 0.14 | 0.37 | 5 | 5.38E-11 | 1 | 1 |
| 43 | 12 | 111284768 | 111284826 | CCDC63    | chr12:111284768-111284826 | 58  | 0.02 | 0.06 | 0.35 | 5 | 7.09E-11 | 0 | 1 |
| 44 | 20 | 36793705  | 36793747  | TGM2      | chr20:36793705-36793747   | 42  | 0.03 | 0.05 | 0.39 | 5 | 7.92E-11 | 1 | 1 |
| 45 | 7  | 30029717  | 30029808  | SCRN1     | chr7:30029717-30029808    | 91  | 0.14 | 0.20 | 0.32 | 6 | 1.08E-10 | 0 | 1 |
| 46 | 17 | 73584029  | 73584111  | MYO15B    | chr17:73584029-73584111   | 82  | 0.08 | 0.09 | 0.26 | 5 | 1.26E-10 | 1 | 1 |
| 47 | 22 | 45680676  | 45680702  | UPK3A     | chr22:45680676-45680702   | 26  | 0.04 | 0.09 | 0.37 | 4 | 1.60E-10 | 1 | 1 |
| 48 | 17 | 16256937  | 16257010  | CENPV     | chr17:16256937-16257010   | 73  | 0.03 | 0.03 | 0.17 | 5 | 1.78E-10 | 0 | 1 |
| 49 | 8  | 1765296   | 1765387   | MIR596    | chr8:1765296-1765387      | 91  | 0.05 | 0.14 | 0.24 | 6 | 1.82E-10 | 0 | 1 |
| 50 | 12 | 8332789   | 8332810   | FAM66C    | chr12:8332789-8332810     | 21  | 0.05 | 0.07 | 0.19 | 4 | 2.72E-10 | 0 | 0 |
| 51 | 12 | 54070517  | 54070610  | ATP5G2    | chr12:54070517-54070610   | 93  | 0.12 | 0.12 | 0.33 | 5 | 3.04E-10 | 0 | 1 |
| 52 | 13 | 50070436  | 50070550  | PHF11     | chr13:50070436-50070550   | 114 | 0.02 | 0.06 | 0.27 | 6 | 3.41E-10 | 0 | 1 |
| 53 | 10 | 97802912  | 97802977  | CCNJ      | chr10:97802912-97802977   | 65  | 0.12 | 0.17 | 0.31 | 6 | 4.21E-10 | 0 | 1 |
| 54 | 5  | 156886970 | 156887005 | NIPAL4    | chr5:156886970-156887005  | 35  | 0.07 | 0.09 | 0.20 | 5 | 4.88E-10 | 1 | 1 |
| 55 | 20 | 21686251  | 21686308  | PAX1      | chr20:21686251-21686308   | 57  | 0.04 | 0.21 | 0.33 | 7 | 6.52E-10 | 1 | 0 |
| 56 | 7  | 101006019 | 101006089 | EMID2     | chr7:101006019-101006089  | 70  | 0.07 | 0.24 | 0.43 | 6 | 7.69E-10 | 0 | 1 |
| 57 | 12 | 133464855 | 133464933 | CHFR      | chr12:133464855-133464933 | 78  | 0.19 | 0.17 | 0.30 | 5 | 9.10E-10 | 0 | 1 |
| 58 | 1  | 31845904  | 31845985  | FABP3     | chr1:31845904-31845985    | 81  | 0.11 | 0.15 | 0.28 | 5 | 9.56E-10 | 0 | 1 |
| 59 | 2  | 85980731  | 85980803  | ATOH8     | chr2:85980731-85980803    | 72  | 0.04 | 0.05 | 0.15 | 6 | 9.60E-10 | 1 | 1 |
| 60 | 6  | 30227783  | 30227883  | HLA-L     | chr6:30227783-30227883    | 100 | 0.05 | 0.12 | 0.25 | 7 | 1.08E-09 | 1 | 1 |
| 61 | 20 | 42544648  | 42544666  | TOX2      | chr20:42544648-42544666   | 18  | 0.15 | 0.17 | 0.40 | 4 | 1.10E-09 | 1 | 1 |
| 62 | 2  | 66667039  | 66667101  | MEIS1     | chr2:66667039-66667101    | 62  | 0.08 | 0.15 | 0.37 | 5 | 1.12E-09 | 1 | 1 |
| 63 | 3  | 136537694 | 136537863 | TMEM22    | chr3:136537694-136537863  | 169 | 0.05 | 0.08 | 0.23 | 8 | 1.19E-09 | 1 | 1 |
| 64 | 8  | 65489863  | 65489939  | LOC401463 | chr8:65489863-65489939    | 76  | 0.08 | 0.12 | 0.28 | 5 | 1.51E-09 | 1 | 1 |
| 65 | 20 | 37353096  | 37353158  | SLC32A1   | chr20:37353096-37353158   | 62  | 0.03 | 0.16 | 0.32 | 4 | 1.60E-09 | 1 | 1 |
| 66 | 8  | 23563925  | 23564031  | NKX2-6    | chr8:23563925-23564031    | 106 | 0.04 | 0.26 | 0.39 | 5 | 1.76E-09 | 1 | 1 |
| 67 | 19 | 20278013  | 20278059  | ZNF486    | chr19:20278013-20278059   | 46  | 0.04 | 0.10 | 0.21 | 4 | 2.01E-09 | 0 | 1 |
| 68 | 11 | 64739320  | 64739374  |           | chr11:64739320-64739374   | 54  | 0.18 | 0.18 | 0.41 | 4 | 2.06E-09 | 1 | 0 |

|     |    |           |           |                |                           |     |      |      |      |    |          |   |   |
|-----|----|-----------|-----------|----------------|---------------------------|-----|------|------|------|----|----------|---|---|
| 69  | 15 | 26108391  | 26108412  | ATP10A         | chr15:26108391-26108412   | 21  | 0.02 | 0.15 | 0.37 | 5  | 2.22E-09 | 1 | 1 |
| 70  | 6  | 28227068  | 28227093  | NKAPL          | chr6:28227068-28227093    | 25  | 0.16 | 0.29 | 0.40 | 5  | 2.26E-09 | 1 | 0 |
| 71  | 10 | 11206772  | 11206892  | CUGBP2         | chr10:11206772-11206892   | 120 | 0.06 | 0.03 | 0.07 | 7  | 2.43E-09 | 0 | 1 |
| 72  | 19 | 56879554  | 56879613  | ZNF542         | chr19:56879554-56879613   | 59  | 0.03 | 0.10 | 0.33 | 4  | 3.05E-09 | 0 | 1 |
| 73  | 20 | 13200929  | 13200992  | ISM1           | chr20:13200929-13200992   | 63  | 0.03 | 0.30 | 0.39 | 10 | 3.24E-09 | 1 | 1 |
| 74  | 20 | 25129507  | 25129562  | LOC284798      | chr20:25129507-25129562   | 55  | 0.05 | 0.15 | 0.26 | 5  | 3.60E-09 | 1 | 1 |
| 75  | 6  | 31649432  | 31649519  | LY6G5C         | chr6:31649432-31649519    | 87  | 0.11 | 0.13 | 0.24 | 5  | 3.79E-09 | 1 | 1 |
| 76  | 3  | 32859377  | 32859445  | TRIM71         | chr3:32859377-32859445    | 68  | 0.04 | 0.09 | 0.21 | 5  | 3.93E-09 | 0 | 1 |
| 77  | 12 | 2800446   | 2800500   | CACNA1C        | chr12:2800446-2800500     | 54  | 0.04 | 0.07 | 0.20 | 4  | 4.20E-09 | 1 | 1 |
| 78  | 20 | 25062754  | 25062860  | VSX1           | chr20:25062754-25062860   | 106 | 0.10 | 0.24 | 0.33 | 7  | 4.24E-09 | 1 | 1 |
| 79  | 11 | 2160875   | 2161009   | IGF2AS;IGF2    | chr11:2160875-2161009     | 134 | 0.09 | 0.19 | 0.27 | 8  | 4.71E-09 | 1 | 0 |
| 80  | 18 | 74961424  | 74961494  | GALR1          | chr18:74961424-74961494   | 70  | 0.07 | 0.14 | 0.25 | 5  | 4.95E-09 | 1 | 1 |
| 81  | 1  | 9884565   | 9884624   | CLSTN1         | chr1:9884565-9884624      | 59  | 0.05 | 0.13 | 0.23 | 6  | 4.97E-09 | 1 | 1 |
| 82  | 15 | 96868935  | 96869043  | NR2F2          | chr15:96868935-96869043   | 108 | 0.09 | 0.12 | 0.23 | 5  | 5.03E-09 | 1 | 0 |
| 83  | 6  | 30647034  | 30647128  | KIAA1949       | chr6:30647034-30647128    | 94  | 0.12 | 0.10 | 0.34 | 4  | 5.10E-09 | 0 | 1 |
| 84  | 11 | 17373103  | 17373180  | DKFZp686O24166 | chr11:17373103-17373180   | 77  | 0.04 | 0.04 | 0.11 | 5  | 5.14E-09 | 1 | 1 |
| 85  | 5  | 140810106 | 140810161 | PCDHGA4        | chr5:140810106-140810161  | 55  | 0.20 | 0.24 | 0.42 | 5  | 5.46E-09 | 0 | 0 |
| 86  | 6  | 166722053 | 166722062 | PRR18          | chr6:166722053-166722062  | 9   | 0.13 | 0.19 | 0.29 | 4  | 5.70E-09 | 1 | 1 |
| 87  | 11 | 44332624  | 44332838  | ALX4           | chr11:44332624-44332838   | 214 | 0.12 | 0.20 | 0.30 | 10 | 5.91E-09 | 1 | 1 |
| 88  | 16 | 1030561   | 1030619   | SOX8           | chr16:1030561-1030619     | 58  | 0.02 | 0.21 | 0.42 | 4  | 6.06E-09 | 1 | 1 |
| 89  | 21 | 34398199  | 34398265  | OLIG2          | chr21:34398199-34398265   | 66  | 0.03 | 0.22 | 0.39 | 5  | 6.71E-09 | 1 | 1 |
| 90  | 17 | 48546258  | 48546321  | CHAD;ACSF2     | chr17:48546258-48546321   | 63  | 0.06 | 0.28 | 0.47 | 4  | 6.75E-09 | 1 | 1 |
| 91  | 17 | 42733662  | 42733729  | C17orf104      | chr17:42733662-42733729   | 67  | 0.09 | 0.18 | 0.37 | 4  | 7.12E-09 | 1 | 0 |
| 92  | 12 | 8025567   | 8025640   | SLC2A14        | chr12:8025567-8025640     | 73  | 0.11 | 0.23 | 0.39 | 4  | 7.14E-09 | 0 | 1 |
| 93  | 7  | 150102721 | 150102791 | LOC728743      | chr7:150102721-150102791  | 70  | 0.04 | 0.02 | 0.20 | 4  | 7.67E-09 | 1 | 1 |
| 94  | 15 | 55880997  | 55881081  | PYGO1          | chr15:55880997-55881081   | 84  | 0.06 | 0.15 | 0.33 | 4  | 8.03E-09 | 1 | 1 |
| 95  | 1  | 165414491 | 165414611 | RXRG           | chr1:165414491-165414611  | 120 | 0.08 | 0.15 | 0.28 | 6  | 8.94E-09 | 1 | 1 |
| 96  | 15 | 26108612  | 26108683  | ATP10A         | chr15:26108612-26108683   | 71  | 0.04 | 0.07 | 0.18 | 5  | 9.33E-09 | 1 | 1 |
| 97  | 12 | 26986763  | 26986864  | ITPR2          | chr12:26986763-26986864   | 101 | 0.04 | 0.03 | 0.14 | 5  | 1.06E-08 | 0 | 1 |
| 98  | 17 | 41924466  | 41924523  | CD300LG        | chr17:41924466-41924523   | 57  | 0.12 | 0.11 | 0.26 | 5  | 1.11E-08 | 0 | 1 |
| 99  | 2  | 106681937 | 106681998 | C2orf40        | chr2:106681937-106681998  | 61  | 0.10 | 0.26 | 0.39 | 4  | 1.12E-08 | 1 | 1 |
| 100 | 10 | 123923050 | 123923099 | TACC2          | chr10:123923050-123923099 | 49  | 0.06 | 0.12 | 0.32 | 4  | 1.30E-08 | 0 | 1 |
| 101 | 6  | 133562246 | 133562275 | EYA4           | chr6:133562246-133562275  | 29  | 0.06 | 0.12 | 0.30 | 5  | 1.31E-08 | 1 | 1 |
| 102 | 2  | 31361757  | 31361818  | GALNT14        | chr2:31361757-31361818    | 61  | 0.13 | 0.14 | 0.26 | 4  | 1.52E-08 | 1 | 1 |

|     |    |           |           |               |                           |    |      |      |      |   |          |   |   |
|-----|----|-----------|-----------|---------------|---------------------------|----|------|------|------|---|----------|---|---|
| 103 | 1  | 179545073 | 179545166 | NPHS2         | chr1:179545073-179545166  | 93 | 0.04 | 0.18 | 0.30 | 5 | 1.59E-08 | 1 | 1 |
| 104 | 10 | 100993553 | 100993597 | HPSE2         | chr10:100993553-100993597 | 44 | 0.05 | 0.13 | 0.29 | 6 | 1.67E-08 | 1 | 1 |
| 105 | 1  | 58715499  | 58715553  | DAB1          | chr1:58715499-58715553    | 54 | 0.04 | 0.10 | 0.33 | 4 | 1.70E-08 | 1 | 1 |
| 106 | 19 | 44324856  | 44324951  | LYPD5         | chr19:44324856-44324951   | 95 | 0.10 | 0.20 | 0.32 | 6 | 1.82E-08 | 0 | 0 |
| 107 | 12 | 115135859 | 115135934 |               | chr12:115135859-115135934 | 75 | 0.12 | 0.19 | 0.33 | 4 | 1.87E-08 | 1 | 1 |
| 108 | 17 | 46799948  | 46800028  | PRAC;C17orf93 | chr17:46799948-46800028   | 80 | 0.12 | 0.19 | 0.37 | 4 | 1.88E-08 | 1 | 1 |
| 109 | 1  | 178693969 | 178694013 | RALGPS2       | chr1:178693969-178694013  | 44 | 0.08 | 0.08 | 0.25 | 4 | 1.99E-08 | 0 | 1 |
| 110 | 6  | 36410485  | 36410553  | PXT1;KCTD20   | chr6:36410485-36410553    | 68 | 0.03 | 0.03 | 0.04 | 7 | 2.05E-08 | 0 | 1 |
| 111 | 4  | 144621898 | 144621971 | FREM3         | chr4:144621898-144621971  | 73 | 0.04 | 0.12 | 0.25 | 5 | 2.14E-08 | 1 | 1 |
| 112 | 11 | 111783327 | 111783355 | CRYAB;HSPB2   | chr11:111783327-111783355 | 28 | 0.22 | 0.25 | 0.39 | 4 | 2.19E-08 | 0 | 0 |
| 113 | 10 | 102891019 | 102891080 | TLX1NB;TLX1   | chr10:102891019-102891080 | 61 | 0.04 | 0.15 | 0.35 | 4 | 2.35E-08 | 1 | 0 |
| 114 | 3  | 50378407  | 50378431  | RASSF1        | chr3:50378407-50378431    | 24 | 0.05 | 0.03 | 0.17 | 5 | 2.69E-08 | 1 | 1 |
| 115 | 2  | 73429308  | 73429371  | NOTO          | chr2:73429308-73429371    | 63 | 0.08 | 0.18 | 0.32 | 5 | 2.88E-08 | 1 | 1 |
| 116 | 5  | 87974369  | 87974464  | LOC645323     | chr5:87974369-87974464    | 95 | 0.12 | 0.21 | 0.31 | 6 | 2.89E-08 | 1 | 1 |
| 117 | 6  | 28510281  | 28510376  |               | chr6:28510281-28510376    | 95 | 0.06 | 0.11 | 0.20 | 7 | 3.04E-08 | 0 | 1 |
| 118 | 11 | 86383236  | 86383300  | ME3           | chr11:86383236-86383300   | 64 | 0.04 | 0.15 | 0.39 | 5 | 3.13E-08 | 1 | 1 |
| 119 | 19 | 38747355  | 38747378  | PPP1R14A      | chr19:38747355-38747378   | 23 | 0.05 | 0.22 | 0.47 | 3 | 3.32E-08 | 1 | 0 |
| 120 | 3  | 46506481  | 46506554  | LTF           | chr3:46506481-46506554    | 73 | 0.17 | 0.23 | 0.35 | 5 | 3.35E-08 | 1 | 1 |
| 121 | 20 | 37434229  | 37434262  | PPP1R16B      | chr20:37434229-37434262   | 33 | 0.02 | 0.06 | 0.32 | 4 | 3.38E-08 | 1 | 1 |
| 122 | 11 | 2161079   | 2161141   | IGF2AS;IGF2   | chr11:2161079-2161141     | 62 | 0.07 | 0.18 | 0.28 | 6 | 3.57E-08 | 1 | 0 |
| 123 | 6  | 2972158   | 2972195   | SERPINB6      | chr6:2972158-2972195      | 37 | 0.12 | 0.13 | 0.26 | 5 | 3.80E-08 | 1 | 1 |
| 124 | 7  | 127670993 | 127671044 | LRRC4;SND1    | chr7:127670993-127671044  | 51 | 0.16 | 0.26 | 0.40 | 4 | 4.01E-08 | 0 | 1 |
| 125 | 20 | 61809827  | 61809841  | MIR124-3      | chr20:61809827-61809841   | 14 | 0.07 | 0.16 | 0.26 | 4 | 4.17E-08 | 1 | 1 |
| 126 | 2  | 29338100  | 29338121  | CLIP4         | chr2:29338100-29338121    | 21 | 0.04 | 0.06 | 0.15 | 4 | 4.40E-08 | 1 | 1 |
| 127 | 19 | 56904945  | 56905032  | ZNF582        | chr19:56904945-56905032   | 87 | 0.04 | 0.14 | 0.30 | 6 | 4.40E-08 | 0 | 1 |
| 128 | 13 | 20768523  | 20768560  | GJB2          | chr13:20768523-20768560   | 37 | 0.07 | 0.06 | 0.22 | 3 | 4.52E-08 | 1 | 1 |
| 129 | 17 | 72733163  | 72733183  | RAB37         | chr17:72733163-72733183   | 20 | 0.02 | 0.04 | 0.23 | 4 | 4.64E-08 | 1 | 1 |
| 130 | 14 | 59932101  | 59932153  | GPR135        | chr14:59932101-59932153   | 52 | 0.02 | 0.06 | 0.16 | 5 | 4.84E-08 | 1 | 1 |
| 131 | 6  | 169653905 | 169653961 | THBS2         | chr6:169653905-169653961  | 56 | 0.12 | 0.24 | 0.40 | 5 | 5.24E-08 | 1 | 1 |
| 132 | 2  | 85107426  | 85107488  | C2orf89       | chr2:85107426-85107488    | 62 | 0.07 | 0.05 | 0.32 | 3 | 5.25E-08 | 1 | 1 |
| 133 | 19 | 38747174  | 38747234  | PPP1R14A      | chr19:38747174-38747234   | 60 | 0.04 | 0.12 | 0.37 | 3 | 5.26E-08 | 1 | 1 |
| 134 | 12 | 15374513  | 15374609  | RERG          | chr12:15374513-15374609   | 96 | 0.05 | 0.04 | 0.19 | 4 | 5.28E-08 | 1 | 0 |
| 135 | 6  | 32119616  | 32119691  | PRRT1         | chr6:32119616-32119691    | 75 | 0.16 | 0.28 | 0.54 | 4 | 5.47E-08 | 1 | 1 |
| 136 | 4  | 165304443 | 165304540 | MARCH1        | chr4:165304443-165304540  | 97 | 0.12 | 0.23 | 0.34 | 6 | 5.58E-08 | 1 | 1 |
| 137 | 18 | 30051521  | 30051572  | FAM59A        | chr18:30051521-30051572   | 51 | 0.05 | 0.12 | 0.26 | 5 | 5.69E-08 | 1 | 1 |

|     |    |           |           |                   |                           |     |      |      |      |    |          |   |   |
|-----|----|-----------|-----------|-------------------|---------------------------|-----|------|------|------|----|----------|---|---|
| 138 | 7  | 27225733  | 27225897  | HOXA11AS;HOXA11   | chr7:27225733-27225897    | 164 | 0.20 | 0.21 | 0.36 | 6  | 5.92E-08 | 1 | 1 |
| 139 | 12 | 115136060 | 115136098 |                   | chr12:115136060-115136098 | 38  | 0.07 | 0.17 | 0.37 | 4  | 6.07E-08 | 1 | 1 |
| 140 | 11 | 133907726 | 133907750 | LOC100128239      | chr11:133907726-133907750 | 24  | 0.05 | 0.03 | 0.13 | 3  | 6.21E-08 | 1 | 1 |
| 141 | 13 | 37006063  | 37006133  | CCNA1             | chr13:37006063-37006133   | 70  | 0.06 | 0.10 | 0.25 | 5  | 6.54E-08 | 1 | 1 |
| 142 | 1  | 13910138  | 13910224  | PDPN              | chr1:13910138-13910224    | 86  | 0.08 | 0.12 | 0.22 | 6  | 6.74E-08 | 0 | 1 |
| 143 | 5  | 1876168   | 1876215   |                   | chr5:1876168-1876215      | 47  | 0.11 | 0.12 | 0.32 | 3  | 7.03E-08 | 1 | 1 |
| 144 | 7  | 19158647  | 19158692  | TWIST1            | chr7:19158647-19158692    | 45  | 0.05 | 0.19 | 0.39 | 4  | 7.05E-08 | 1 | 0 |
| 145 | 6  | 30095546  | 30095570  |                   | chr6:30095546-30095570    | 24  | 0.08 | 0.10 | 0.31 | 3  | 8.30E-08 | 1 | 1 |
| 146 | 19 | 57019005  | 57019069  | ZNF471            | chr19:57019005-57019069   | 64  | 0.04 | 0.30 | 0.49 | 4  | 8.68E-08 | 0 | 1 |
| 147 | 1  | 38470540  | 38470665  | FHL3              | chr1:38470540-38470665    | 125 | 0.07 | 0.09 | 0.23 | 4  | 8.73E-08 | 0 | 1 |
| 148 | 16 | 3068315   | 3068382   | CLDN6             | chr16:3068315-3068382     | 67  | 0.04 | 0.08 | 0.17 | 4  | 8.93E-08 | 1 | 1 |
| 149 | 13 | 78493282  | 78493365  | EDNRB             | chr13:78493282-78493365   | 83  | 0.04 | 0.12 | 0.21 | 7  | 8.99E-08 | 0 | 1 |
| 150 | 12 | 133065906 | 133065941 | FBRSL1            | chr12:133065906-133065941 | 35  | 0.03 | 0.06 | 0.15 | 6  | 9.40E-08 | 1 | 1 |
| 151 | 2  | 37571677  | 37571732  | QPCT              | chr2:37571677-37571732    | 55  | 0.08 | 0.15 | 0.28 | 5  | 9.56E-08 | 1 | 1 |
| 152 | 4  | 42399843  | 42399858  | SHISA3            | chr4:42399843-42399858    | 15  | 0.02 | 0.06 | 0.43 | 3  | 1.00E-07 | 1 | 1 |
| 153 | 13 | 112721712 | 112721789 | SOX1              | chr13:112721712-112721789 | 77  | 0.13 | 0.28 | 0.35 | 6  | 1.04E-07 | 1 | 1 |
| 154 | 6  | 30523350  | 30523440  | GNL1;PRR3         | chr6:30523350-30523440    | 90  | 0.05 | 0.04 | 0.09 | 6  | 1.05E-07 | 0 | 1 |
| 155 | 17 | 43339476  | 43339515  | C17orf46          | chr17:43339476-43339515   | 39  | 0.03 | 0.05 | 0.17 | 4  | 1.07E-07 | 0 | 1 |
| 156 | 18 | 30051176  | 30051374  | FAM59A            | chr18:30051176-30051374   | 198 | 0.05 | 0.06 | 0.10 | 10 | 1.08E-07 | 1 | 1 |
| 157 | 3  | 141516232 | 141516291 | GRK7              | chr3:141516232-141516291  | 59  | 0.03 | 0.04 | 0.32 | 3  | 1.10E-07 | 1 | 1 |
| 158 | 12 | 54409207  | 54409257  | HOXC4;HOXC6;HOXC5 | chr12:54409207-54409257   | 50  | 0.12 | 0.25 | 0.45 | 4  | 1.13E-07 | 1 | 0 |
| 159 | 6  | 105628000 | 105628063 | POPDC3            | chr6:105628000-105628063  | 63  | 0.04 | 0.12 | 0.20 | 7  | 1.20E-07 | 1 | 1 |
| 160 | 2  | 39187533  | 39187543  | LOC375196         | chr2:39187533-39187543    | 10  | 0.01 | 0.10 | 0.30 | 3  | 1.21E-07 | 1 | 1 |
| 161 | 10 | 82116365  | 82116456  | DYDC2;DYDC1       | chr10:82116365-82116456   | 91  | 0.05 | 0.13 | 0.24 | 6  | 1.21E-07 | 0 | 1 |
| 162 | 1  | 45792660  | 45792733  | HPDL              | chr1:45792660-45792733    | 73  | 0.02 | 0.03 | 0.14 | 4  | 1.26E-07 | 0 | 1 |
| 163 | 6  | 117086996 | 117087083 | FAM162B           | chr6:117086996-117087083  | 87  | 0.10 | 0.16 | 0.26 | 4  | 1.29E-07 | 1 | 1 |
| 164 | 1  | 92952440  | 92952467  | GFI1              | chr1:92952440-92952467    | 27  | 0.06 | 0.12 | 0.42 | 3  | 1.30E-07 | 1 | 1 |
| 165 | 6  | 133562035 | 133562101 | EYA4              | chr6:133562035-133562101  | 66  | 0.07 | 0.13 | 0.26 | 4  | 1.30E-07 | 1 | 1 |
| 166 | 14 | 52535949  | 52536022  | NID2              | chr14:52535949-52536022   | 73  | 0.08 | 0.13 | 0.26 | 5  | 1.30E-07 | 1 | 1 |
| 167 | 1  | 164290179 | 164290275 |                   | chr1:164290179-164290275  | 96  | 0.18 | 0.24 | 0.45 | 4  | 1.31E-07 | 0 | 0 |
| 168 | 2  | 176971961 | 176972113 | HOXD11            | chr2:176971961-176972113  | 152 | 0.11 | 0.22 | 0.31 | 7  | 1.37E-07 | 1 | 1 |
| 169 | 8  | 37595307  | 37595363  | ERLIN2            | chr8:37595307-37595363    | 56  | 0.04 | 0.01 | 0.09 | 3  | 1.39E-07 | 0 | 1 |
| 170 | 11 | 131780329 | 131780357 | NTM               | chr11:131780329-131780357 | 28  | 0.06 | 0.20 | 0.31 | 5  | 1.43E-07 | 1 | 1 |
| 171 | 3  | 121902561 | 121902622 | CASR              | chr3:121902561-121902622  | 61  | 0.22 | 0.27 | 0.46 | 3  | 1.54E-07 | 1 | 1 |



|     |    |           |           |                     |                           |     |      |      |      |   |          |   |   |
|-----|----|-----------|-----------|---------------------|---------------------------|-----|------|------|------|---|----------|---|---|
| 172 | 1  | 236849942 | 236849994 | ACTN2               | chr1:236849942-236849994  | 52  | 0.05 | 0.25 | 0.44 | 3 | 1.55E-07 | 1 | 1 |
| 173 | 2  | 87088796  | 87088843  | CD8B                | chr2:87088796-87088843    | 47  | 0.17 | 0.24 | 0.38 | 4 | 1.57E-07 | 1 | 1 |
| 174 | 6  | 30095728  | 30095802  |                     | chr6:30095728-30095802    | 74  | 0.10 | 0.09 | 0.26 | 3 | 1.62E-07 | 1 | 1 |
| 175 | 17 | 66255210  | 66255265  | ARSG                | chr17:66255210-66255265   | 55  | 0.05 | 0.03 | 0.13 | 4 | 1.63E-07 | 0 | 0 |
| 176 | 6  | 110797476 | 110797506 | SLC22A16            | chr6:110797476-110797506  | 30  | 0.05 | 0.08 | 0.36 | 3 | 1.65E-07 | 0 | 0 |
| 177 | 7  | 94284623  | 94284678  | SGCE;PEG10          | chr7:94284623-94284678    | 55  | 0.06 | 0.05 | 0.20 | 4 | 1.66E-07 | 0 | 1 |
| 178 | 17 | 5026540   | 5026574   | ZNF232              | chr17:5026540-5026574     | 34  | 0.06 | 0.09 | 0.20 | 3 | 1.67E-07 | 0 | 0 |
| 179 | 1  | 248100585 | 248100614 | OR2L13              | chr1:248100585-248100614  | 29  | 0.23 | 0.22 | 0.34 | 4 | 1.75E-07 | 0 | 0 |
| 180 | 14 | 100111263 | 100111354 | HHIPL1              | chr14:100111263-100111354 | 91  | 0.11 | 0.27 | 0.36 | 6 | 2.06E-07 | 1 | 1 |
| 181 | 12 | 54071165  | 54071194  | ATP5G2              | chr12:54071165-54071194   | 29  | 0.12 | 0.22 | 0.48 | 3 | 2.06E-07 | 0 | 1 |
| 182 | 19 | 53073242  | 53073334  | ZNF701              | chr19:53073242-53073334   | 92  | 0.13 | 0.21 | 0.40 | 4 | 2.08E-07 | 0 | 1 |
| 183 | 10 | 15761854  | 15761881  | ITGA8               | chr10:15761854-15761881   | 27  | 0.06 | 0.19 | 0.30 | 4 | 2.10E-07 | 1 | 1 |
| 184 | 5  | 41870856  | 41870910  | OXCT1               | chr5:41870856-41870910    | 54  | 0.06 | 0.03 | 0.09 | 5 | 2.14E-07 | 1 | 1 |
| 185 | 1  | 67772972  | 67773044  | IL12RB2             | chr1:67772972-67773044    | 72  | 0.08 | 0.22 | 0.37 | 4 | 2.19E-07 | 1 | 1 |
| 186 | 12 | 4384879   | 4384890   | CCND2               | chr12:4384879-4384890     | 11  | 0.06 | 0.07 | 0.26 | 3 | 2.19E-07 | 1 | 1 |
| 187 | 15 | 101419243 | 101419333 | ALDH1A3             | chr15:101419243-101419333 | 90  | 0.08 | 0.21 | 0.47 | 7 | 2.20E-07 | 1 | 1 |
| 188 | 10 | 135050326 | 135050355 | VENTX               | chr10:135050326-135050355 | 29  | 0.04 | 0.28 | 0.43 | 4 | 2.26E-07 | 1 | 1 |
| 189 | 12 | 113909932 | 113910034 | LHX5                | chr12:113909932-113910034 | 102 | 0.11 | 0.15 | 0.20 | 6 | 2.29E-07 | 1 | 1 |
| 190 | 15 | 79383841  | 79383890  | RASGRF1             | chr15:79383841-79383890   | 49  | 0.06 | 0.05 | 0.13 | 5 | 2.35E-07 | 1 | 1 |
| 191 | 5  | 5139853   | 5139878   | ADAMTS16            | chr5:5139853-5139878      | 25  | 0.05 | 0.24 | 0.40 | 5 | 2.37E-07 | 1 | 1 |
| 192 | 2  | 239140169 | 239140190 | LOC151174           | chr2:239140169-239140190  | 21  | 0.02 | 0.12 | 0.43 | 3 | 2.40E-07 | 1 | 1 |
| 193 | 3  | 45838028  | 45838094  | SLC6A20             | chr3:45838028-45838094    | 66  | 0.04 | 0.09 | 0.18 | 5 | 2.41E-07 | 1 | 1 |
| 194 | 12 | 115134344 | 115134391 |                     | chr12:115134344-115134391 | 47  | 0.16 | 0.26 | 0.43 | 4 | 2.45E-07 | 1 | 0 |
| 195 | 22 | 31002942  | 31003010  | TCN2                | chr22:31002942-31003010   | 68  | 0.08 | 0.10 | 0.21 | 4 | 2.46E-07 | 1 | 1 |
| 196 | 1  | 150947566 | 150947589 | LASS2               | chr1:150947566-150947589  | 23  | 0.04 | 0.04 | 0.29 | 3 | 2.50E-07 | 0 | 1 |
| 197 | 8  | 132052843 | 132052942 | ADCY8               | chr8:132052843-132052942  | 99  | 0.08 | 0.21 | 0.31 | 5 | 2.59E-07 | 1 | 1 |
| 198 | 20 | 61051751  | 61051802  | GATA5               | chr20:61051751-61051802   | 51  | 0.09 | 0.12 | 0.24 | 5 | 2.62E-07 | 1 | 0 |
| 199 | 20 | 56725833  | 56725899  | C20orf85            | chr20:56725833-56725899   | 66  | 0.09 | 0.15 | 0.23 | 6 | 2.69E-07 | 1 | 1 |
| 200 | 8  | 61194072  | 61194111  | CA8                 | chr8:61194072-61194111    | 39  | 0.02 | 0.06 | 0.19 | 5 | 2.80E-07 | 0 | 1 |
| 201 | 19 | 58220773  | 58220837  | ZNF154              | chr19:58220773-58220837   | 64  | 0.14 | 0.23 | 0.42 | 3 | 2.85E-07 | 0 | 1 |
| 202 | 22 | 23522460  | 23522551  | BCR                 | chr22:23522460-23522551   | 91  | 0.08 | 0.09 | 0.21 | 5 | 2.96E-07 | 1 | 1 |
| 203 | 6  | 30228153  | 30228169  | HLA-L               | chr6:30228153-30228169    | 16  | 0.25 | 0.23 | 0.44 | 3 | 2.98E-07 | 1 | 1 |
| 204 | 12 | 123380870 | 123380891 | VPS37B              | chr12:123380870-123380891 | 21  | 0.17 | 0.25 | 0.41 | 4 | 3.02E-07 | 1 | 1 |
| 205 | 7  | 149569946 | 149570071 | ATP6V0E2            | chr7:149569946-149570071  | 125 | 0.20 | 0.22 | 0.31 | 6 | 3.03E-07 | 1 | 1 |
| 206 | 10 | 25464132  | 25464196  | LOC100128811;GPR158 | chr10:25464132-25464196   | 64  | 0.08 | 0.26 | 0.34 | 5 | 3.04E-07 | 1 | 1 |

|     |    |           |           |            |                           |     |      |      |      |   |          |   |   |
|-----|----|-----------|-----------|------------|---------------------------|-----|------|------|------|---|----------|---|---|
| 207 | 1  | 236228741 | 236228755 | NID1       | chr1:236228741-236228755  | 14  | 0.04 | 0.27 | 0.42 | 3 | 3.12E-07 | 1 | 1 |
| 208 | 12 | 3862417   | 3862497   | EFCAB4B    | chr12:3862417-3862497     | 80  | 0.04 | 0.05 | 0.13 | 7 | 3.15E-07 | 1 | 1 |
| 209 | 18 | 904851    | 904963    | ADCYAP1    | chr18:904851-904963       | 112 | 0.07 | 0.18 | 0.25 | 6 | 3.41E-07 | 1 | 1 |
| 210 | 19 | 22605151  | 22605234  | ZNF98      | chr19:22605151-22605234   | 83  | 0.11 | 0.24 | 0.36 | 4 | 3.63E-07 | 0 | 0 |
| 211 | 1  | 154377364 | 154377429 | IL6R       | chr1:154377364-154377429  | 65  | 0.11 | 0.17 | 0.29 | 4 | 3.76E-07 | 1 | 1 |
| 212 | 1  | 244213577 | 244213618 | ZNF238     | chr1:244213577-244213618  | 41  | 0.13 | 0.20 | 0.47 | 3 | 3.85E-07 | 1 | 1 |
| 213 | 10 | 50887566  | 50887632  | C10orf53   | chr10:50887566-50887632   | 66  | 0.08 | 0.16 | 0.26 | 5 | 3.88E-07 | 1 | 1 |
| 214 | 22 | 23522307  | 23522374  | BCR;BCR    | chr22:23522307-23522374   | 67  | 0.25 | 0.27 | 0.46 | 3 | 4.01E-07 | 1 | 1 |
| 215 | 19 | 22235256  | 22235281  | ZNF257     | chr19:22235256-22235281   | 25  | 0.19 | 0.27 | 0.40 | 3 | 4.04E-07 | 0 | 0 |
| 216 | 10 | 28034792  | 28034856  | MKX        | chr10:28034792-28034856   | 64  | 0.04 | 0.29 | 0.39 | 6 | 4.12E-07 | 1 | 1 |
| 217 | 1  | 41444788  | 41444871  | CTPS       | chr1:41444788-41444871    | 83  | 0.25 | 0.26 | 0.43 | 6 | 4.31E-07 | 0 | 1 |
| 218 | 1  | 111217691 | 111217715 | KCNA3      | chr1:111217691-111217715  | 24  | 0.05 | 0.06 | 0.33 | 3 | 4.39E-07 | 1 | 1 |
| 219 | 10 | 71333152  | 71333216  | NEUROG3    | chr10:71333152-71333216   | 64  | 0.06 | 0.08 | 0.13 | 5 | 4.59E-07 | 1 | 1 |
| 220 | 21 | 44073202  | 44073246  | PDE9A      | chr21:44073202-44073246   | 44  | 0.21 | 0.19 | 0.36 | 3 | 4.76E-07 | 1 | 1 |
| 221 | 19 | 15580383  | 15580445  | PGLYRP2    | chr19:15580383-15580445   | 62  | 0.10 | 0.19 | 0.42 | 3 | 4.77E-07 | 1 | 0 |
| 222 | 8  | 67344553  | 67344588  | ADHFE1     | chr8:67344553-67344588    | 35  | 0.04 | 0.10 | 0.45 | 3 | 4.78E-07 | 0 | 1 |
| 223 | 16 | 30075511  | 30075547  | ALDOA      | chr16:30075511-30075547   | 36  | 0.04 | 0.04 | 0.27 | 3 | 5.10E-07 | 0 | 1 |
| 224 | 17 | 45810359  | 45810436  | TBX21      | chr17:45810359-45810436   | 77  | 0.20 | 0.12 | 0.24 | 6 | 5.19E-07 | 1 | 1 |
| 225 | 22 | 44287841  | 44287958  | PNPLA5     | chr22:44287841-44287958   | 117 | 0.10 | 0.11 | 0.18 | 5 | 5.22E-07 | 1 | 1 |
| 226 | 14 | 24641155  | 24641189  | REC8       | chr14:24641155-24641189   | 34  | 0.08 | 0.19 | 0.32 | 3 | 5.27E-07 | 0 | 1 |
| 227 | 2  | 29337946  | 29337988  | CLIP4      | chr2:29337946-29337988    | 42  | 0.10 | 0.07 | 0.20 | 3 | 5.45E-07 | 1 | 1 |
| 228 | 20 | 21494679  | 21494762  | NKX2-2     | chr20:21494679-21494762   | 83  | 0.15 | 0.29 | 0.38 | 6 | 5.46E-07 | 1 | 1 |
| 229 | 6  | 30711636  | 30711680  | IER3;FLOT1 | chr6:30711636-30711680    | 44  | 0.04 | 0.03 | 0.12 | 5 | 5.49E-07 | 0 | 1 |
| 230 | 15 | 74658547  | 74658573  | CYP11A1    | chr15:74658547-74658573   | 26  | 0.03 | 0.07 | 0.38 | 3 | 5.52E-07 | 1 | 1 |
| 231 | 1  | 6515580   | 6515624   | ESPN       | chr1:6515580-6515624      | 44  | 0.14 | 0.25 | 0.47 | 3 | 5.58E-07 | 1 | 0 |
| 232 | 12 | 119772354 | 119772421 | CCDC60     | chr12:119772354-119772421 | 67  | 0.17 | 0.19 | 0.33 | 4 | 5.58E-07 | 1 | 1 |
| 233 | 11 | 111385450 | 111385496 | C11orf88   | chr11:111385450-111385496 | 46  | 0.03 | 0.07 | 0.28 | 3 | 5.60E-07 | 1 | 1 |
| 234 | 5  | 40835740  | 40835760  | RPL37      | chr5:40835740-40835760    | 20  | 0.19 | 0.11 | 0.28 | 3 | 5.93E-07 | 0 | 1 |
| 235 | 8  | 143858612 | 143858636 | LYNX1      | chr8:143858612-143858636  | 24  | 0.05 | 0.26 | 0.43 | 3 | 6.14E-07 | 0 | 1 |
| 236 | 3  | 137483479 | 137483555 | SOX14      | chr3:137483479-137483555  | 76  | 0.17 | 0.27 | 0.36 | 5 | 6.36E-07 | 1 | 1 |
| 237 | 12 | 4381777   | 4381803   | CCND2      | chr12:4381777-4381803     | 26  | 0.03 | 0.01 | 0.04 | 5 | 6.37E-07 | 1 | 1 |
| 238 | 12 | 104697387 | 104697419 | TXNRD1     | chr12:104697387-104697419 | 32  | 0.13 | 0.16 | 0.40 | 3 | 6.47E-07 | 0 | 1 |
| 239 | 6  | 151814892 | 151814994 | C6orf97    | chr6:151814892-151814994  | 102 | 0.17 | 0.16 | 0.24 | 5 | 6.55E-07 | 1 | 1 |
| 240 | 4  | 188916668 | 188916726 | ZFP42      | chr4:188916668-188916726  | 58  | 0.08 | 0.29 | 0.44 | 4 | 6.76E-07 | 0 | 1 |

|     |    |           |           |               |                           |     |      |      |      |   |          |   |   |
|-----|----|-----------|-----------|---------------|---------------------------|-----|------|------|------|---|----------|---|---|
| 241 | 4  | 48485289  | 48485328  | SLC10A4       | chr4:48485289-48485328    | 39  | 0.08 | 0.15 | 0.24 | 5 | 6.86E-07 | 1 | 1 |
| 242 | 11 | 105481283 | 105481322 | GRIA4         | chr11:105481283-105481322 | 39  | 0.04 | 0.15 | 0.27 | 6 | 6.91E-07 | 1 | 1 |
| 243 | 4  | 2765896   | 2765951   |               | chr4:2765896-2765951      | 55  | 0.04 | 0.02 | 0.15 | 3 | 7.21E-07 | 0 | 1 |
| 244 | 6  | 87646922  | 87646986  | HTR1E         | chr6:87646922-87646986    | 64  | 0.11 | 0.11 | 0.22 | 4 | 7.33E-07 | 1 | 1 |
| 245 | 11 | 7041491   | 7041685   | ZNF214;NLRP14 | chr11:7041491-7041685     | 194 | 0.05 | 0.10 | 0.16 | 9 | 7.45E-07 | 0 | 1 |
| 246 | 6  | 26240505  | 26240528  | HIST1H4F      | chr6:26240505-26240528    | 23  | 0.05 | 0.05 | 0.18 | 3 | 7.52E-07 | 0 | 1 |
| 247 | 6  | 62996119  | 62996132  | KHDRBS2       | chr6:62996119-62996132    | 13  | 0.05 | 0.16 | 0.36 | 3 | 7.63E-07 | 0 | 1 |
| 248 | 14 | 69726197  | 69726254  | GALNTL1       | chr14:69726197-69726254   | 57  | 0.07 | 0.18 | 0.29 | 4 | 7.76E-07 | 1 | 1 |
| 249 | 7  | 3083721   | 3083773   | CARD11        | chr7:3083721-3083773      | 52  | 0.10 | 0.07 | 0.29 | 3 | 7.95E-07 | 0 | 1 |
| 250 | 2  | 218621486 | 218621497 | DIRC3         | chr2:218621486-218621497  | 11  | 0.23 | 0.20 | 0.42 | 3 | 8.29E-07 | 1 | 0 |
| 251 | 1  | 24882153  | 24882207  | C1orf130      | chr1:24882153-24882207    | 54  | 0.12 | 0.25 | 0.43 | 3 | 8.31E-07 | 1 | 1 |
| 252 | 8  | 67344640  | 67344665  | ADHFE1        | chr8:67344640-67344665    | 25  | 0.07 | 0.13 | 0.40 | 3 | 8.40E-07 | 0 | 1 |
| 253 | 1  | 207627492 | 207627601 | CR2           | chr1:207627492-207627601  | 109 | 0.04 | 0.03 | 0.08 | 4 | 8.44E-07 | 1 | 1 |
| 254 | 10 | 47083283  | 47083355  | PPYR1         | chr10:47083283-47083355   | 72  | 0.16 | 0.16 | 0.30 | 4 | 8.51E-07 | 1 | 1 |
| 255 | 2  | 175208588 | 175208605 |               | chr2:175208588-175208605  | 17  | 0.06 | 0.16 | 0.42 | 3 | 8.51E-07 | 1 | 1 |
| 256 | 3  | 26663551  | 26663626  | LRRC3B        | chr3:26663551-26663626    | 75  | 0.20 | 0.30 | 0.43 | 3 | 8.55E-07 | 1 | 1 |

## Supplementary Method: region-specific methylation analysis on HumanMethylation450 BeadChip

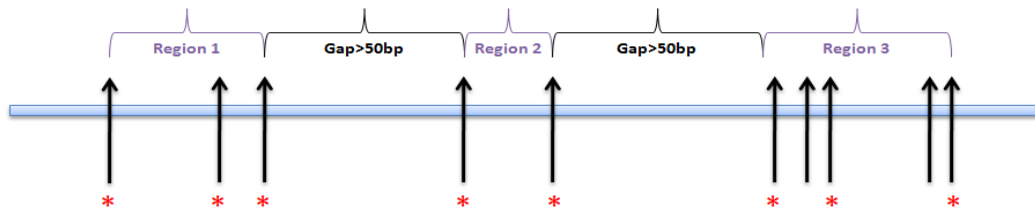

\*CpG site with FDR<0.05

$$FDR_{region} = 10^{2k} \prod_{i=1}^k FDR_i \quad \text{Equation (1)}$$

As shown in the figure above, the adjacent CpG sites within 50bp were merged into one region. So we integrated the individual CpG sites targeted by HumanMethylation450 into small regions. The significance level of differential methylation for a region is estimated as Equation (1), where  $k$  is the number of CpG sites with FDR<0.05 from LIMMA analysis within the region. To avoid the array-design bias that the genomic regions with high density of genes have better coverage by HumanMethylation450 BeadChip than the poor-gene regions, we corrected FDR of a region using a correction parameter  $10^{2k}$ , thus the number of CpG sites designed on the BeadChip within the region was taken into consideration in the analysis.

Supplementary Figure S1 Power estimation in the discovery set

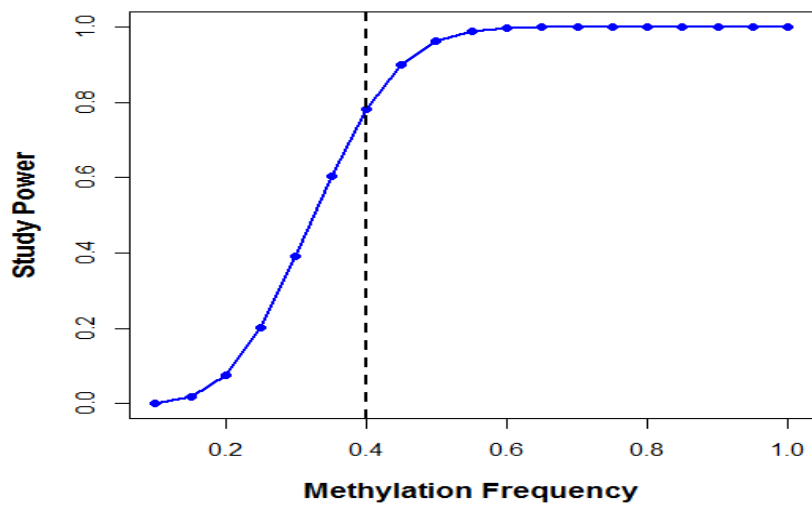

Supplementary Figure S2 Category of *de novo* methylated CpG sites in solid tumours

Liver cancer

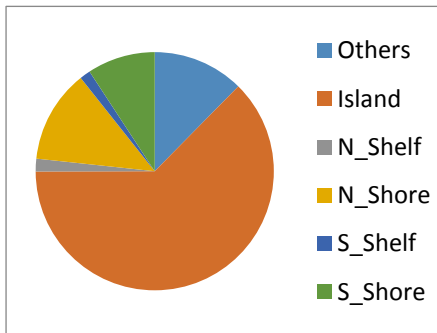

Rectal cancer

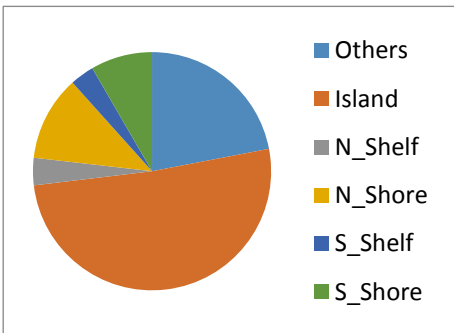

Colon cancer

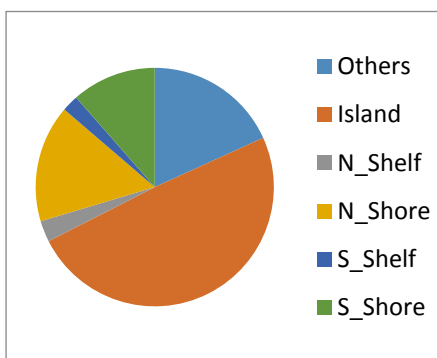

Lung squamous cell carcinoma

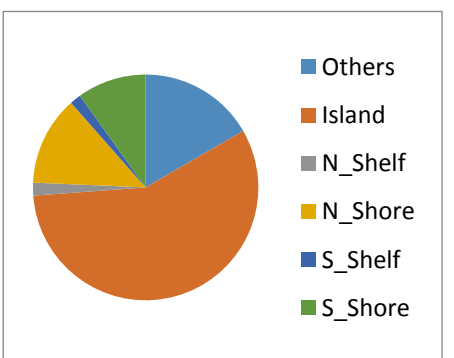

**Thyroid cancer**

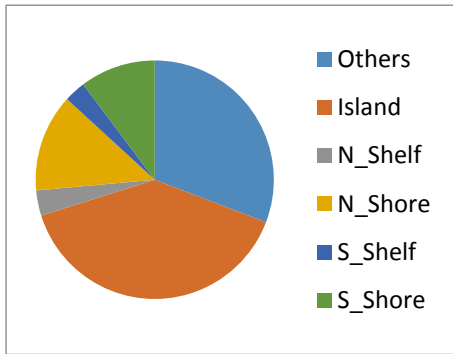

**Kidney cancer**

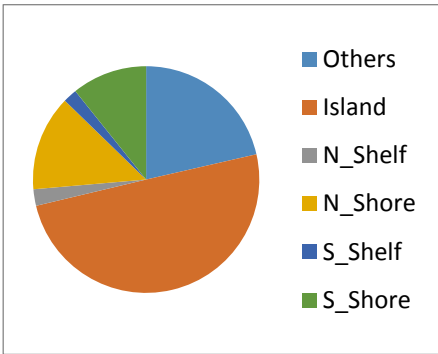

**Invasive breast cancer**

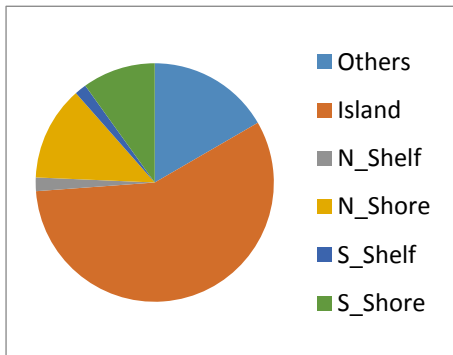

**Lung Adenocarcinoma**

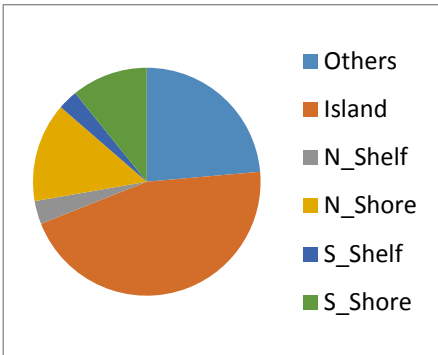

**Pancreatic cancer**

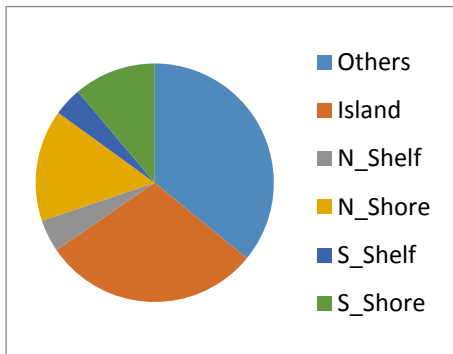

**Prostate Cancer**

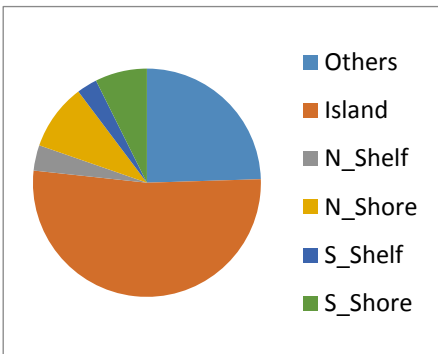

**Head & neck cancer**

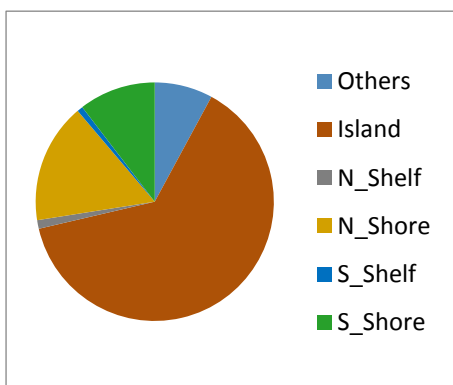

**Supplementary Figure S3 Bisulphite pyrosequencing of six *de novo* methylated loci identified by Illumina Infinium Assay in NPC**

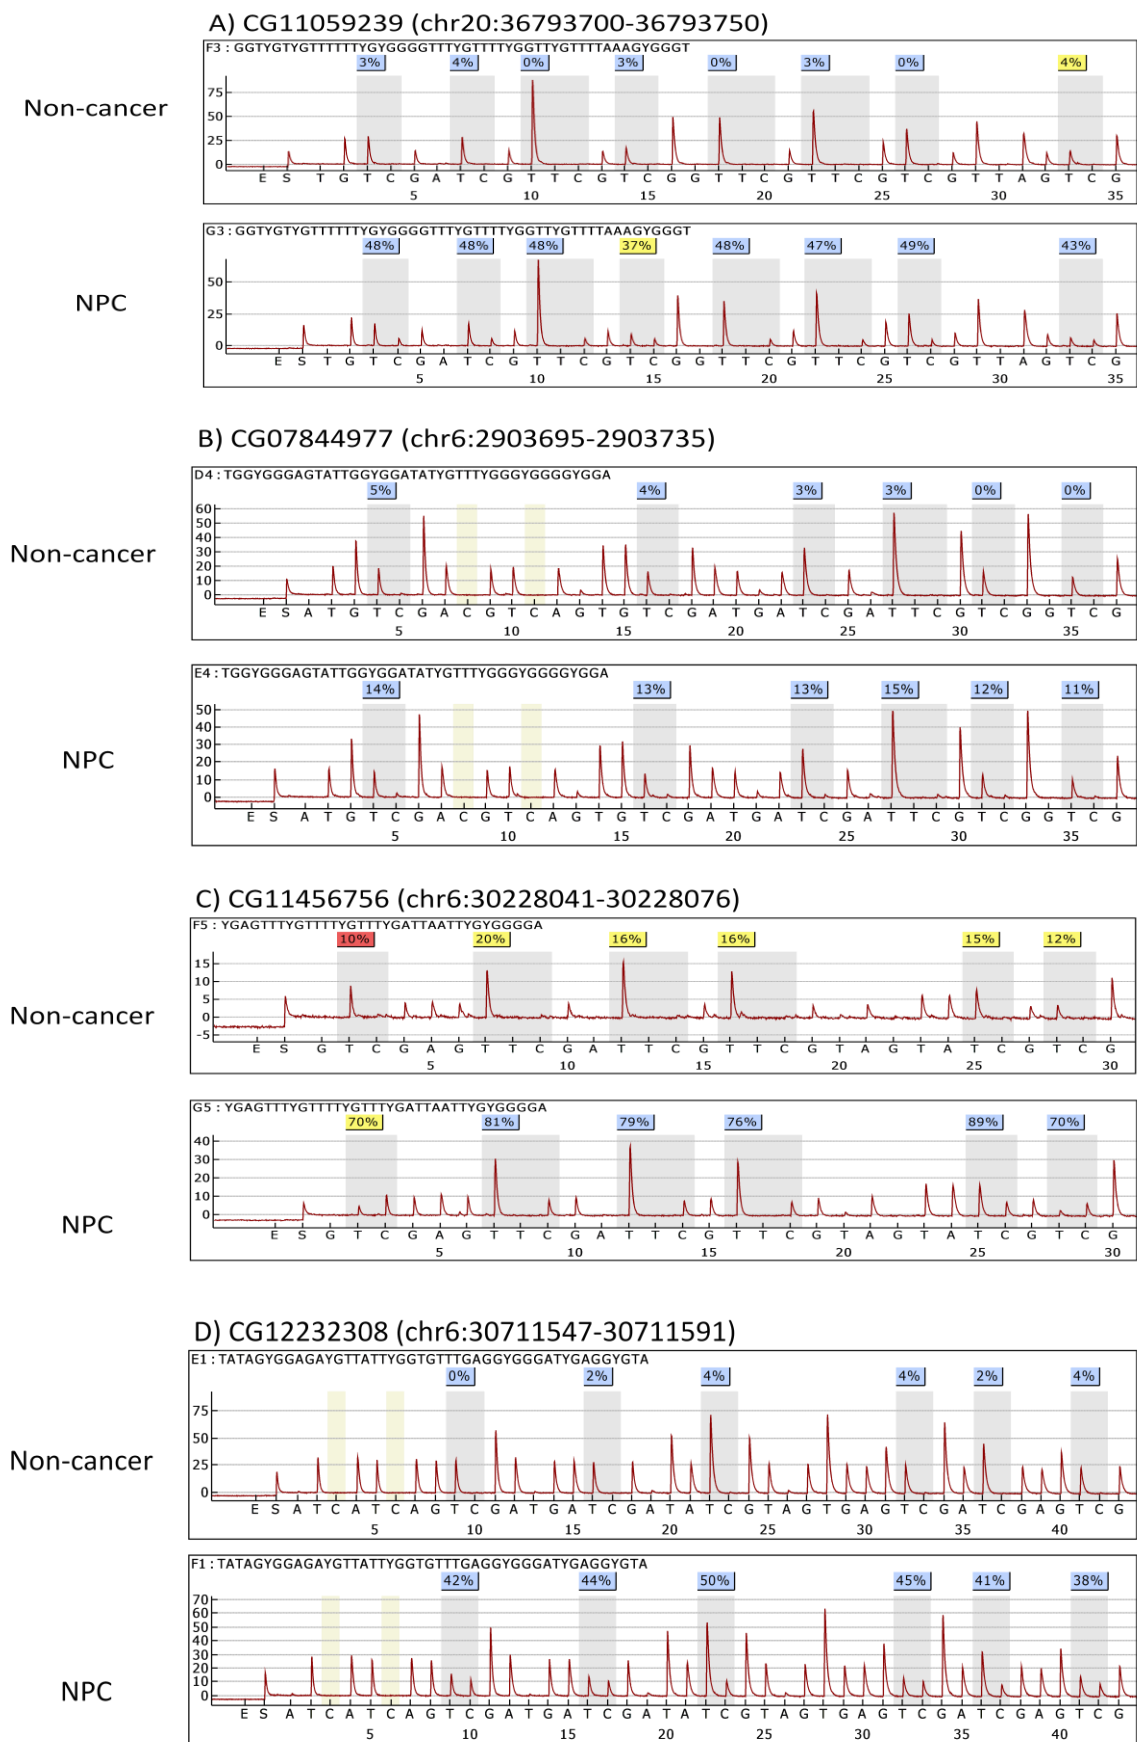

**E) CG11664500 (chr6:133562458-133562497)**

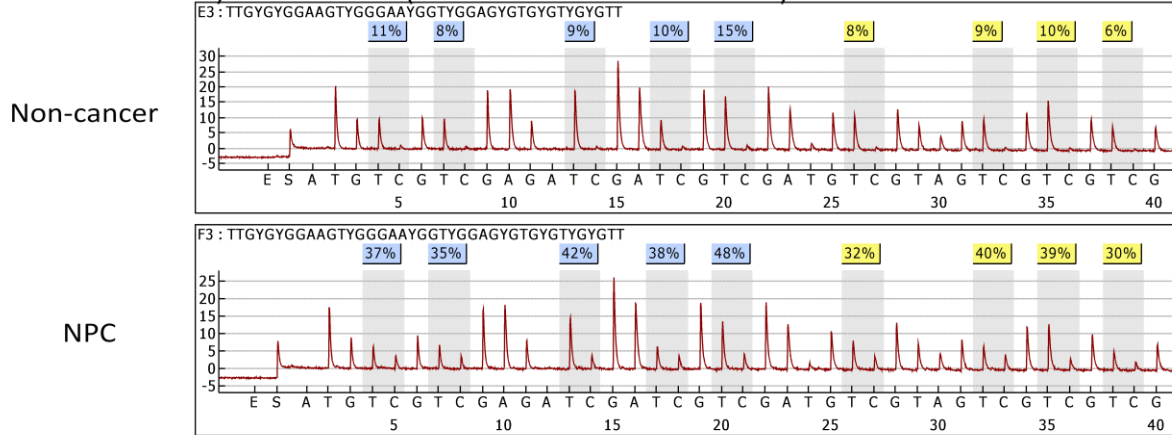

**F) CG22903300 (chr6: 29760751-29760786 )**

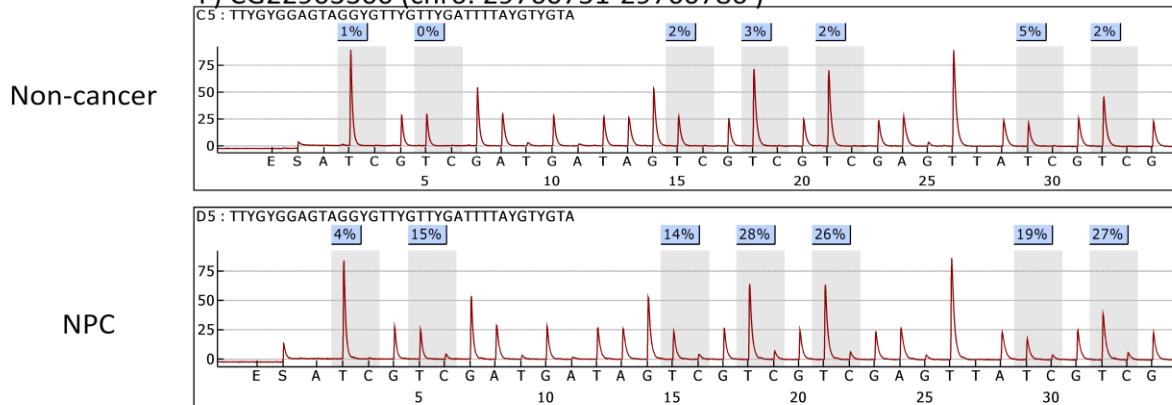

**Supplementary Figure S4: Enrichment of H3K27me3 and H3K4me3 at the *de novo* methylated loci**

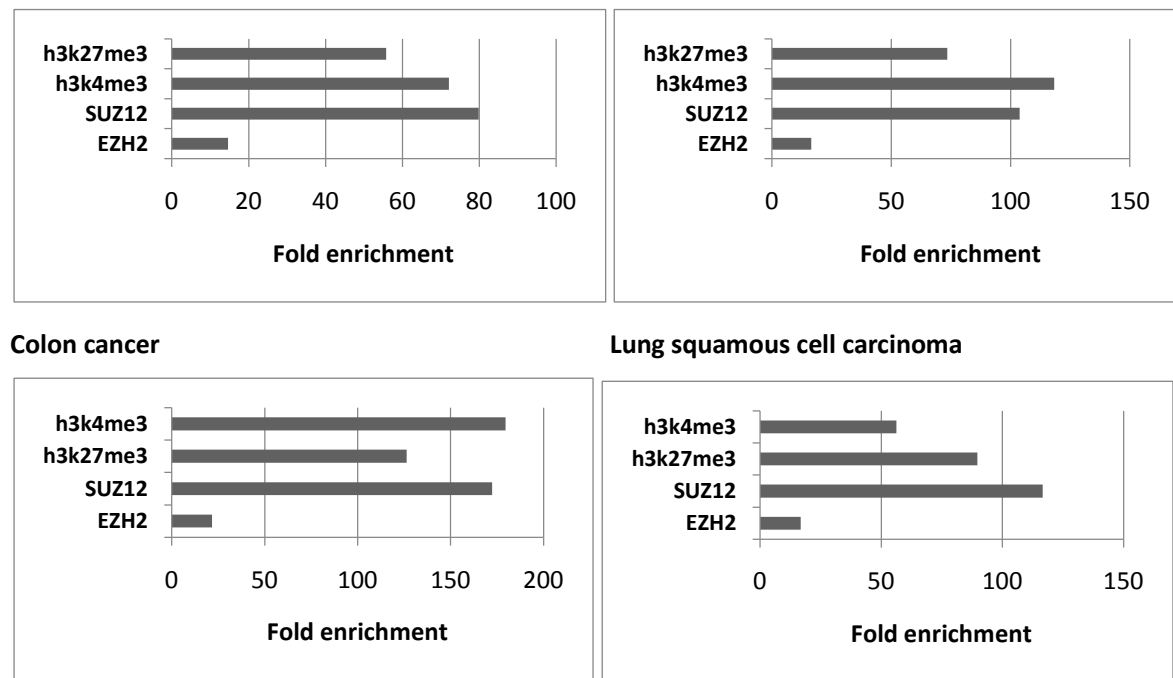



### Thyroid cancer

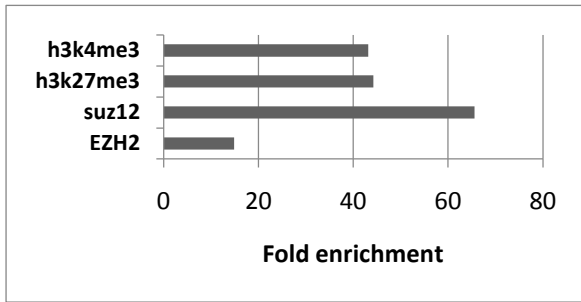

### Kidney cancer

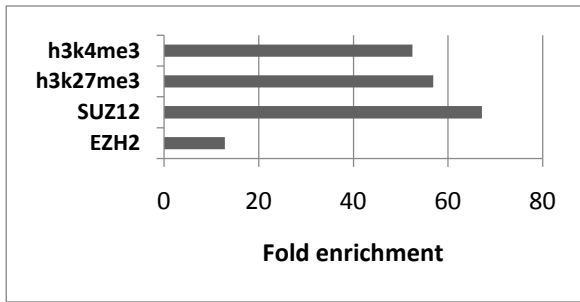

### Invasive breast cancer

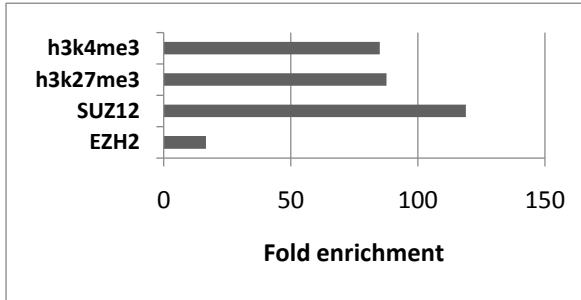

### Lung adenocarcinoma

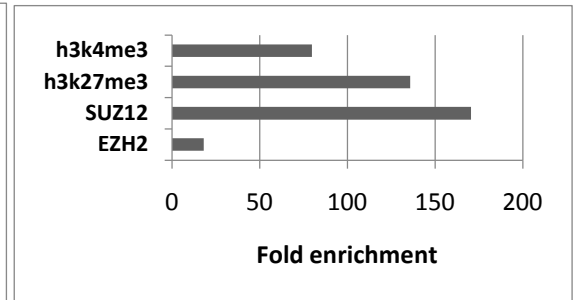

### Pancreatic cancer

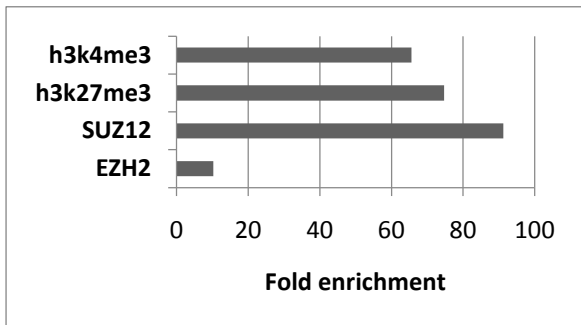

### Prostate cancer

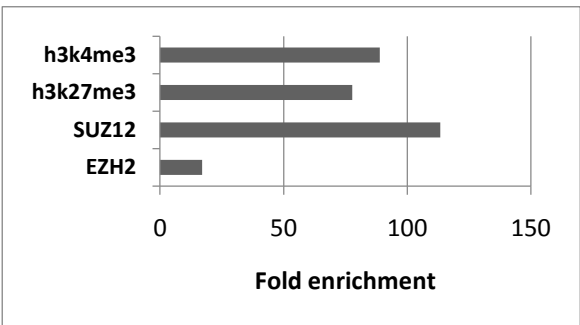

### Head & neck cancer

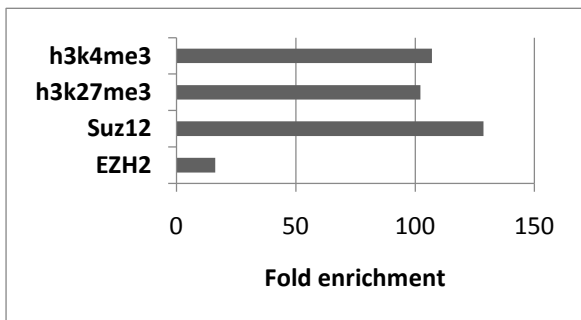

Supplementary Figure S5: Permutation test in the region-specific analysis in NPC

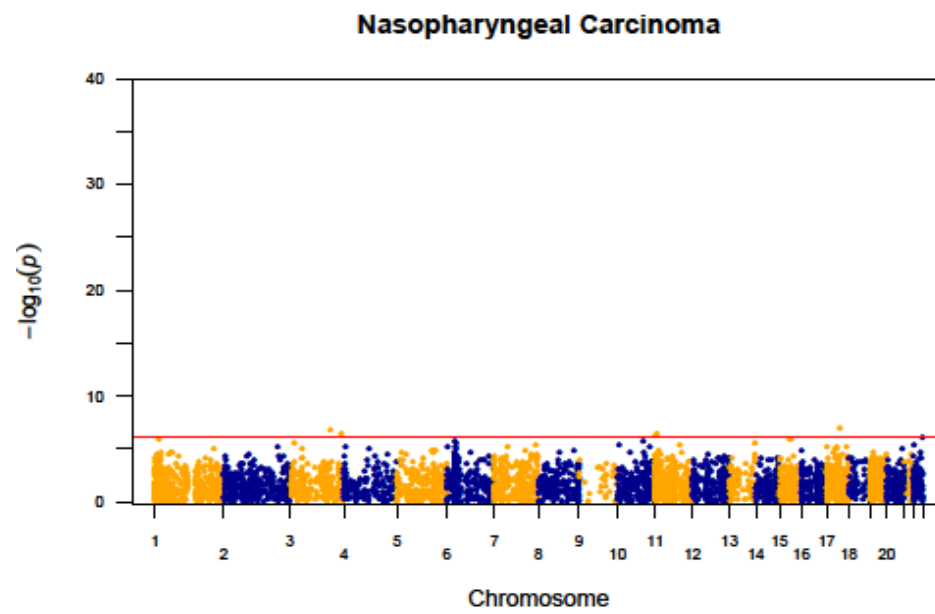

Supplementary Figure S6: Region-specific analysis of methylome data in

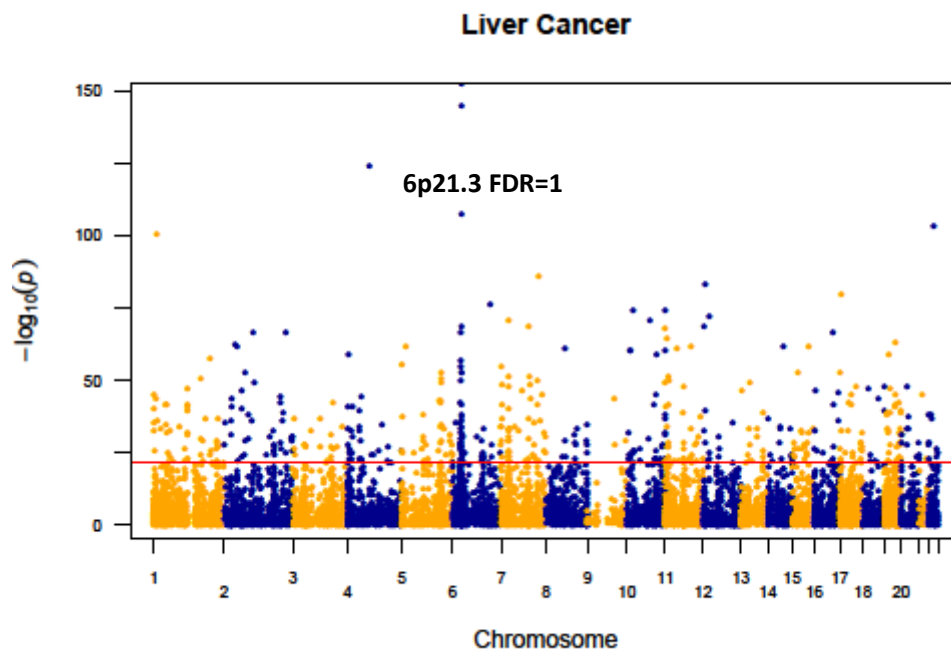

### Rectal Cancer

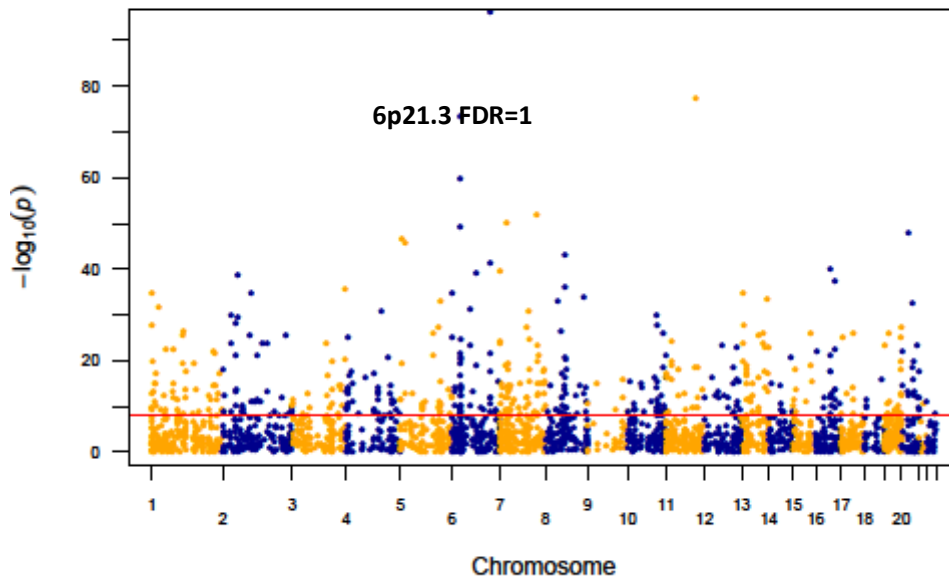

### Lung squamous cell carcinoma

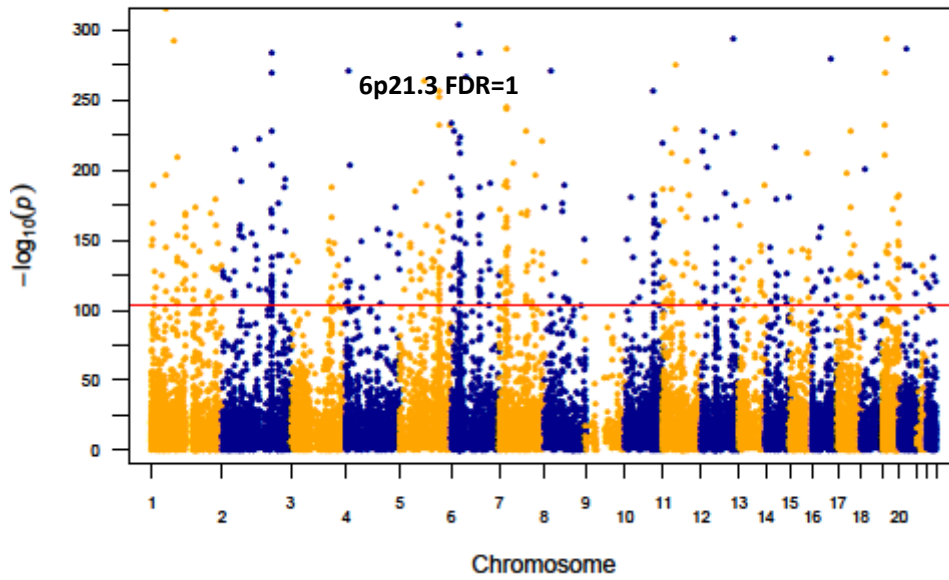

### Thyroid Cancer

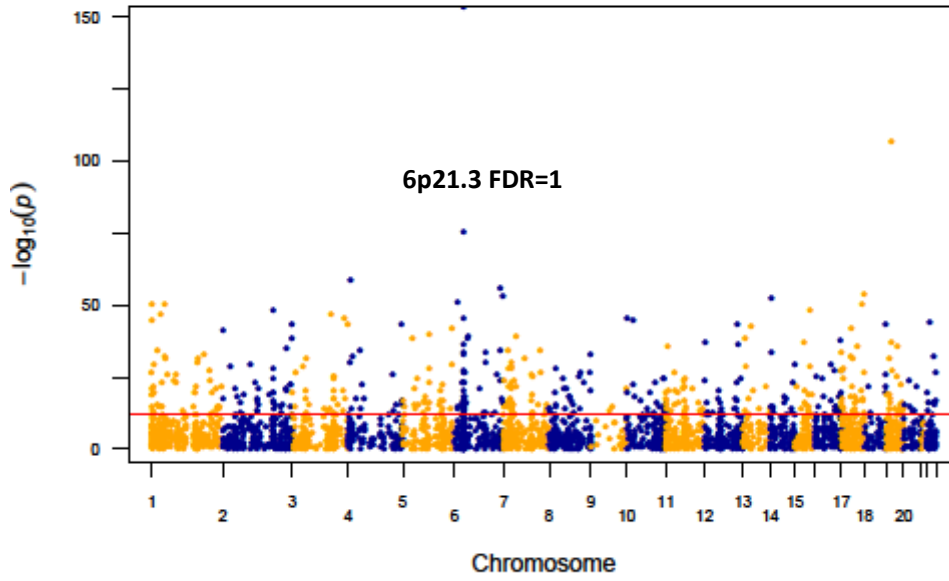

### Breast Cancer

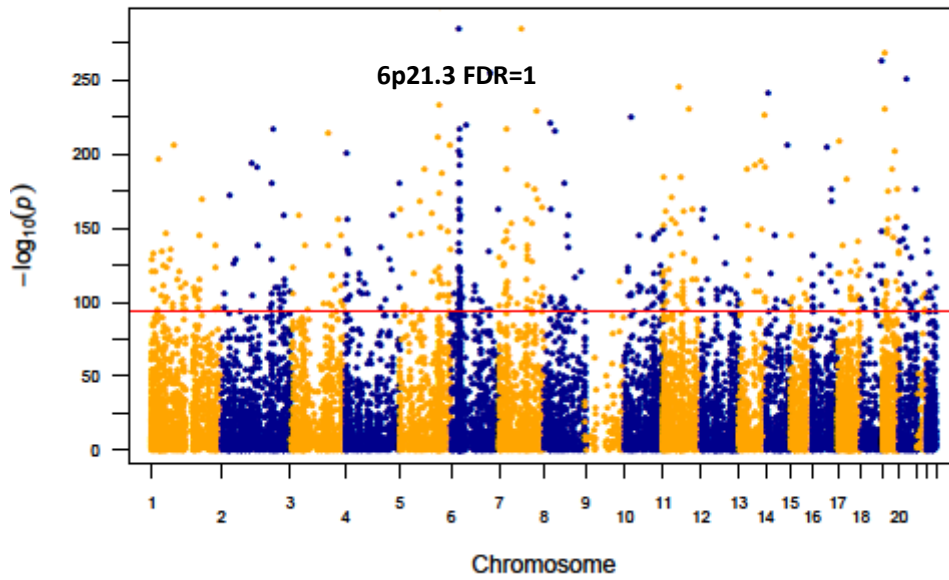

### Lung Adenocarcinoma

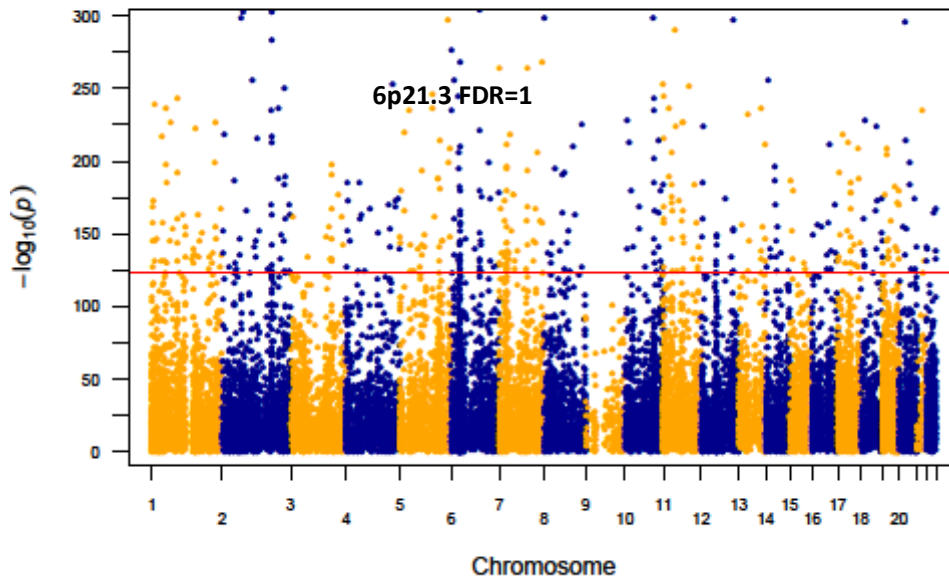

### Prostate Cancer

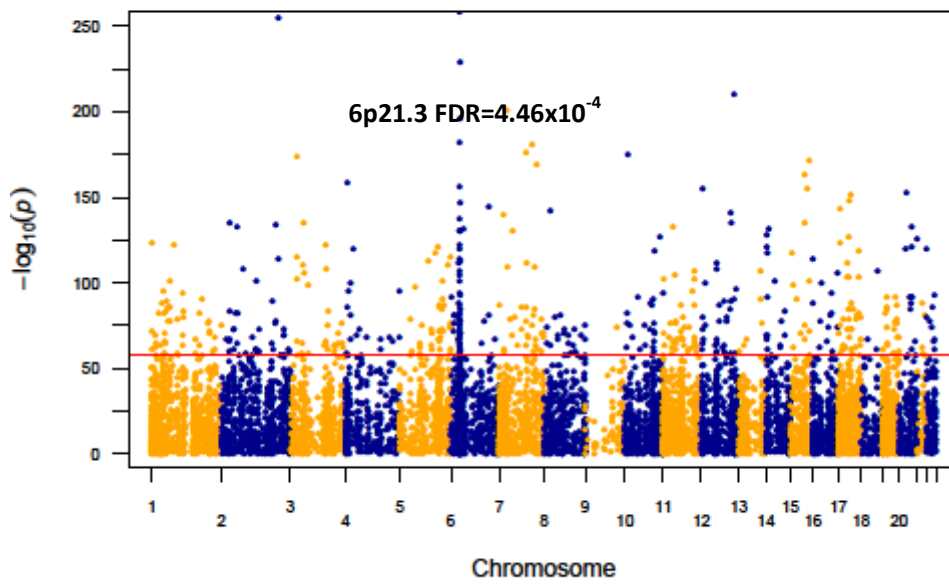

### Head & neck cancer

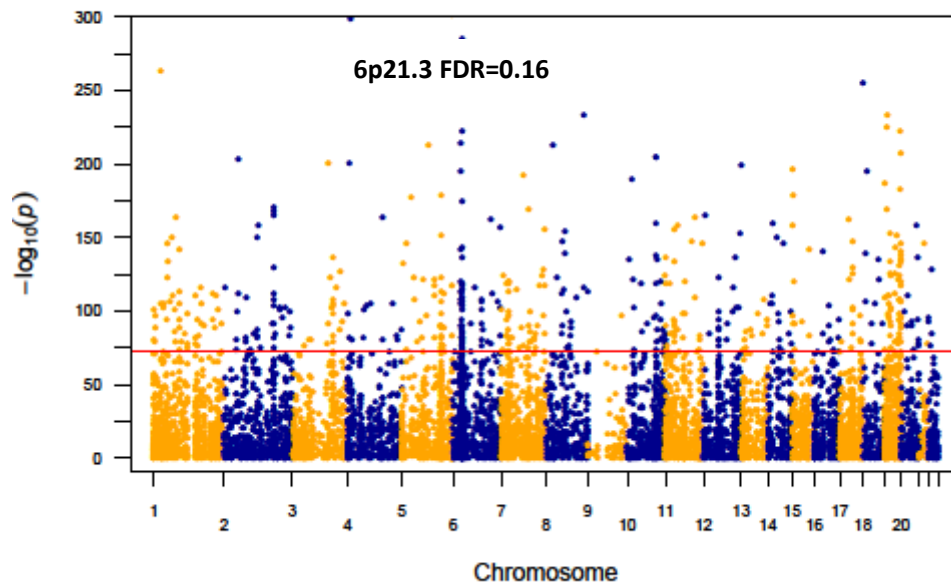

Supplementary Figure S7: Expression of B3GALT4 and disease-free survival in ovarian cancer (left) and lung cancer (right)\*

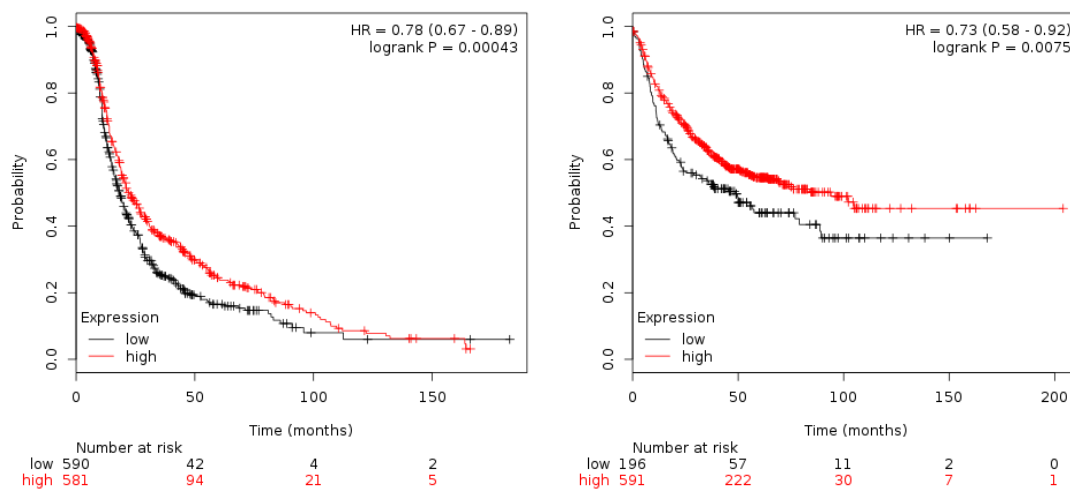

\*The analysis is done by Kaplan Meier Plotter (<http://kmplot.com/analysis/>)
